# Supplementary material for: Use of peripheral blood transcriptomic biomarkers to distinguish high-grade cervical squamous intraepithelial lesions from low-grade lesions
Source: PubMed Central journal article supplement — Oncol Lett. 2020 Jun 26;20(3):2280–90. doi: 10.3892/ol.2020.11779 (PMC7403635; doi:10.3892/ol.2020.11779), 2020-06-26

Figure S1. Heat map of gene expression and hierarchical cluster diagram showing the performance of 7 candidate genes and the 7-gene panel for clustering of 65 healthy controls and 102 SIL patients. (A) 7 separate candidate genes and (B) the 7-gene panel. The figure was generated using the 'Heatmap' function in R with default settings. SIL, squamous intraepithelial lesion.

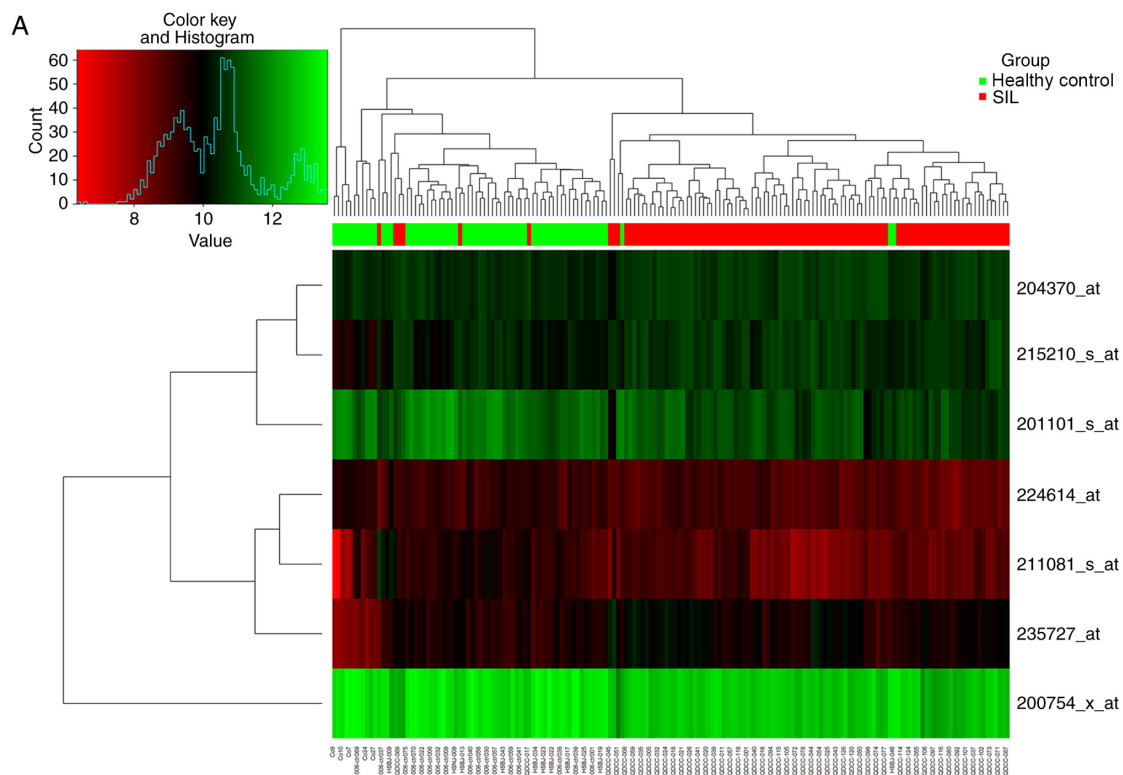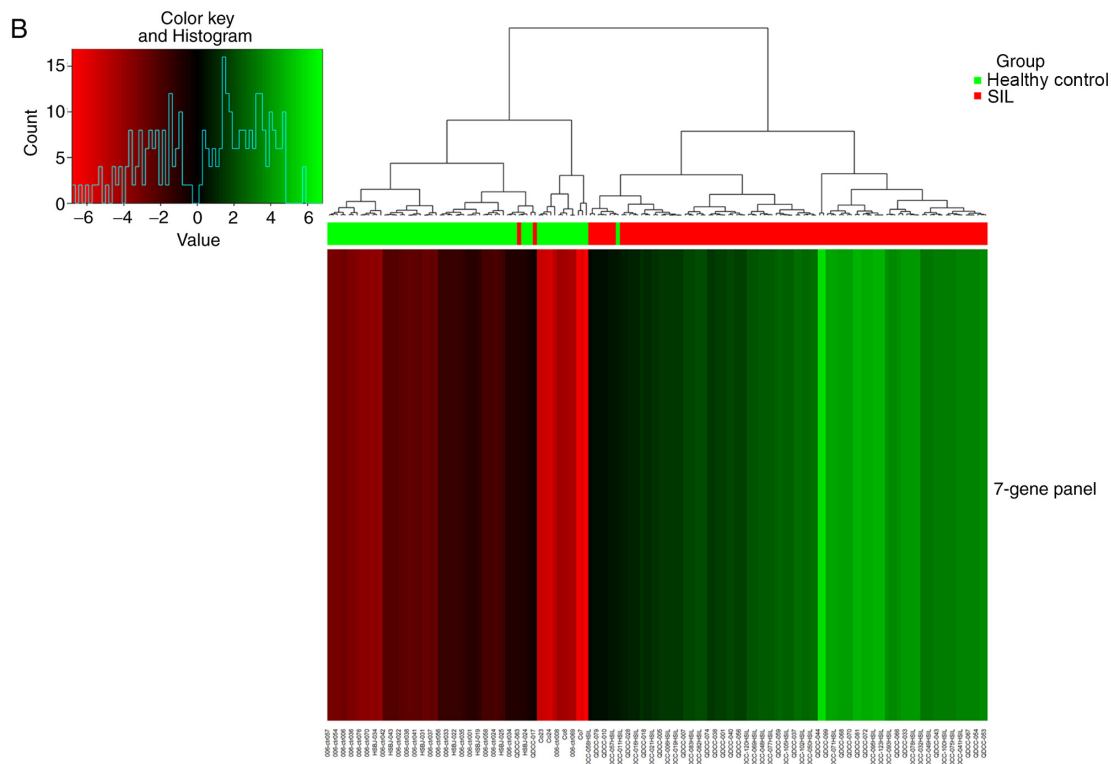

Supplement: Supplementary_Data1.pdf [file Supplementary_Data1.pdf]
